# Supplementary material for: Transcriptomic Analysis of High Fat Diet Fed Mouse Brain Cortex
Source: Front Genet. 2019 Feb 19;10:83. doi: 10.3389/fgene.2019.00083 (PMC6389608; doi:10.3389/fgene.2019.00083)
Supplement: TABLE S3 — List of lncRNAs with their average expression level and fold change between the cortex from normal and high fat diet fed mice. The lncRNAs with expression level higher than thresholds in both pipelines were selected with the same criteria applied for mRNAs as in Supplementary Table S1. For the selection of lncRNAs with significant expression change, the lncRNAs changed more than 40% in its expression level and P-value less than 0.1 were selected in STAR-cuffnorm pipeline. For Salmon-edgeR pipeline, the lncRNAs changed more than 40% in its expression level and top 10% lncRNAs based on its P-value were selected. The lncRNAs selected in both pipelines were combined for the following analysis. [file Table_3.XLSX]

## Sheet: lncRNA_list
Supplementary Table S3			STAR-Cuffnorm				Salmon-EdgeR
Gene ID	Gene Name	Class	Normal Average FPKM	High fat diet Average FPKM	Log2(Fold change)	T-test	log2(Fold change)	logCPM	P-value	Selected
ENSMUSG00000073274.4	RP23-146O20.1	processed_transcript	0.698729	1.41453	1.01752	0.000199128	0.846634	2.41816	2.60454e-09	Y
ENSMUSG00000100213.1	RP24-287C2.2	lincRNA	3.48192	6.00898	0.787236	0.000316421	0.74257	1.72302	2.21878e-06	Y
ENSMUSG00000113184.1	RP23-442M3.3	lincRNA	5.94095	9.92074	0.739754	0.000342238	0.599952	3.76813	3.3299e-08	Y
ENSMUSG00000086859.3	Snhg20	lincRNA	15.587	26.5363	0.767627	0.000417774	0.639453	3.31049	1.96035e-07	Y
ENSMUSG00000032846.10	Zswim6	processed_transcript	8.26705	5.86273	-0.495799	0.000564201	-0.557345	4.97647	8.29404e-10	Y
ENSMUSG00000115529.1	RP23-47H16.3	antisense	1.96045	0.647598	-1.59801	0.000860103	-1.35905	2.32944	1.76427e-13	Y
ENSMUSG00000053714.8	RP23-457F4.2	antisense	1.5868	2.92296	0.881309	0.000914663	0.550717	2.83373	1.48452e-05	Y
ENSMUSG00000064043.13	Trerf1	processed_transcript	2.62338	4.42659	0.754769	0.000980569	0.606748	4.56817	1.38783e-08	Y
ENSMUSG00000104178.1	RP23-14P23.3	lincRNA	3.49974	6.59619	0.914387	0.00102043	0.777252	2.26307	4.74736e-07	Y
ENSMUSG00000115099.1	RP23-296J16.2	lincRNA	1.13082	2.07341	0.87463	0.00171581	0.687859	2.28732	1.14792e-05	Y
ENSMUSG00000097767.8	Miat	lincRNA	38.2117	61.259	0.680906	0.00186827	0.574799	8.42689	1.1183e-07	Y
ENSMUSG00000100851.1	RP24-63O23.1	lincRNA	4.0102	8.90008	1.15014	0.00229903	1.04827	3.15946	3.3018e-09	Y
ENSMUSG00000091475.2	RP24-209I7.2	processed_transcript	16.807	11.9022	-0.497831	0.00243058	-0.587456	3.75735	5.03376e-07	Y
ENSMUSG00000104237.1	RP23-247A1.7	lincRNA	0.658047	1.5366	1.22348	0.00299062	0.995191	0.782668	9.18308e-07	Y
ENSMUSG00000068151.7	AC132685.1	lincRNA	4.43317	7.93414	0.839736	0.00353856	0.657392	3.55198	4.1673e-08	Y
ENSMUSG00000100147.2	RP24-131B6.1	lincRNA	4.28378	2.60987	-0.71491	0.00433116	-0.854873	3.01448	8.68421e-08	Y
ENSMUSG00000085609.1	RP23-143A14.3	processed_transcript	3.07205	1.41911	-1.11421	0.00561807	-1.15768	1.81855	2.20218e-07	Y
ENSMUSG00000110924.1	RP23-103O7.2	lincRNA	1.06305	2.11738	0.994072	0.00600324	0.856006	2.36556	6.30364e-06	Y
ENSMUSG00000074776.4	RP23-346B18.2	lincRNA	2.75584	1.01486	-1.44121	0.0085589	-1.49459	1.19871	1.49817e-07	Y
ENSMUSG00000116029.1	RP23-453I1.1	lincRNA	2.37574	6.16174	1.37496	0.0102135	1.255	1.31261	9.54796e-06	Y
ENSMUSG00000072769.6	RP24-317M4.4	lincRNA	23.3086	33.0635	0.504376	0.0111535	0.498814	5.82628	9.11183e-06	Y
ENSMUSG00000085565.1	AC133954.1	lincRNA	0.883969	1.51984	0.781846	0.0114425	0.664141	2.31904	6.14801e-06	Y
ENSMUSG00000097452.2	RP23-438M9.1	lincRNA	3.51857	5.38502	0.613964	0.01532	0.546448	3.85966	1.26577e-05	Y
ENSMUSG00000045813.7	RP23-238L7.1	lincRNA	2.01917	4.34473	1.10551	0.0240966	0.65875	1.70483	3.77337e-06	Y
ENSMUSG00000111219.1	RP24-87K15.8	processed_transcript	1.4208	1.41987	-0.000943373	0.892617	-0.9242	4.0169	9.34704e-10
ENSMUSG00000100252.6	Mir124-2hg	lincRNA	19.4567	29.2868	0.589982	3.79911e-05	0.456191	5.43026	0.000535637
ENSMUSG00000021268.17	Meg3	lincRNA	293.095	414.301	0.499308	4.63496e-05	0.405256	10.7631	2.26952e-09
ENSMUSG00000074415.13	RP23-442M18.1	processed_transcript	5.22978	8.56025	0.710904	0.000107644	0.435989	4.45619	0.000587303
ENSMUSG00000109121.1	RP24-236C17.2	lincRNA	1.00841	2.22903	1.14433	0.00017866	0.667426	2.47797	0.000142418
ENSMUSG00000115936.1	RP23-207P21.2	lincRNA	1.55561	0.594327	-1.38815	0.000237954	-0.802834	0.699273	0.000106599
ENSMUSG00000090086.7	AC158114.3	lincRNA	7.66305	11.7818	0.620563	0.000292852	0.480844	3.19604	3.95129e-05
ENSMUSG00000097732.2	RP23-201I4.9	lincRNA	1.29352	2.01628	0.64039	0.000394894	0.474194	1.63881	0.00152131
ENSMUSG00000109006.2	RP23-407N2.2	lincRNA	7.63405	11.4912	0.590008	0.000521228	0.447242	3.90197	8.24366e-06
ENSMUSG00000100826.6	Snhg14	processed_transcript	10.4925	14.8694	0.50299	0.000610541	0.381599	10.6867	5.40696e-09
ENSMUSG00000087266.2	AC125262.1	antisense	0.638829	1.39996	1.13188	0.000633858	0.527475	2.1775	0.00034907
ENSMUSG00000075020.6	RP23-201G13.1	lincRNA	4.30192	2.43121	-0.823304	0.000801142	-0.471636	2.18668	0.000834954
ENSMUSG00000116125.1	RP23-383D13.2	antisense	0.876516	2.04874	1.22489	0.0011253	0.88741	0.974847	3.86938e-05
ENSMUSG00000044471.12	Lncpint	lincRNA	14.0017	21.8553	0.642384	0.0011742	0.467149	4.59535	1.73957e-05
ENSMUSG00000109125.1	RP24-267C3.3	lincRNA	2.04473	2.93571	0.521798	0.00181615	0.422149	5.90869	1.24276e-05
ENSMUSG00000097166.1	RP23-387P23.6	antisense	1.65244	2.34913	0.50753	0.00232901	0.352604	0.989287	0.0543514
ENSMUSG00000053574.4	RP23-207N15.6	processed_transcript	0.880116	1.36898	0.637341	0.00250043	0.54622	1.54289	0.00335775
ENSMUSG00000087535.2	Zmiz1os1	antisense	0.915345	1.63778	0.839355	0.00260113	0.543561	1.49691	0.000887524
ENSMUSG00000110830.1	RP23-331E5.8	antisense	1.75917	2.48274	0.497039	0.00295043	0.339006	1.65667	0.0641915
ENSMUSG00000097177.8	RP23-229N10.4	processed_transcript	1.10815	2.03906	0.879749	0.0033258	0.494022	1.60475	0.00297406
ENSMUSG00000097287.2	RP23-151C5.1	lincRNA	3.0202	4.23534	0.487837	0.00341973	0.468919	3.35492	0.000165644
ENSMUSG00000054457.5	RP23-474J7.2	processed_transcript	1.31896	2.20295	0.740036	0.00386106	0.500846	1.27744	0.00451098
ENSMUSG00000106304.1	RP24-317M4.3	lincRNA	1.06101	2.3057	1.11977	0.00457989	0.686533	0.499187	0.00566667
ENSMUSG00000087178.7	AC102121.3	processed_transcript	2.13301	1.49014	-0.517444	0.00478348	-0.0834939	3.91429	0.422476
ENSMUSG00000110317.1	RP23-60P23.9	lincRNA	1.04548	1.54187	0.560505	0.00498475	0.479426	1.91325	0.00149762
ENSMUSG00000106515.4	RP23-473G18.1	lincRNA	1.10977	1.86546	0.749279	0.00571653	0.653081	1.27657	0.00256992
ENSMUSG00000086095.2	AC134570.1	lincRNA	0.791619	1.30204	0.717899	0.00587047	0.62166	1.34098	0.000451641
ENSMUSG00000110027.1	RP24-163K4.1	lincRNA	0.85392	1.37718	0.689541	0.00593315	0.545255	1.68176	0.00198982
ENSMUSG00000100891.1	RP23-392G15.1	lincRNA	2.17465	3.16365	0.540805	0.00750791	0.535903	1.97141	0.000758935
ENSMUSG00000109394.1	RP23-54G8.4	lincRNA	5.87871	8.78215	0.579074	0.00771824	0.347256	4.77179	0.0041093
ENSMUSG00000116180.1	RP23-432N1.7	bidirectional_promoter_lncRNA	1.45595	2.09621	0.525824	0.00790389	0.422829	1.99031	0.00629028
ENSMUSG00000097859.1	Gm26601	lincRNA	1.03744	1.8889	0.864518	0.0104772	0.644676	2.34241	0.000579043
ENSMUSG00000108137.1	RP23-392K24.5	lincRNA	0.879385	1.46796	0.739243	0.0108454	0.376289	0.527807	0.0586016
ENSMUSG00000084904.1	RP23-272D10.4	lincRNA	1.10767	1.77755	0.682359	0.0112184	0.550864	2.69054	0.000202723
ENSMUSG00000113960.1	RP23-29I5.5	lincRNA	1.12197	1.71217	0.609785	0.0117797	0.692214	1.00396	0.000118527
ENSMUSG00000105152.1	RP23-156K23.4	lincRNA	0.867136	1.48412	0.77528	0.0126632	0.583873	1.30484	0.00359589
ENSMUSG00000091562.3	RP24-120O11.3	processed_transcript	2.80184	1.83242	-0.612625	0.0127053	-0.652473	2.44561	2.7922e-05
ENSMUSG00000084950.7	RP23-226O20.3	antisense	3.01275	5.00291	0.731685	0.0129363	0.497718	2.65052	0.00249005
ENSMUSG00000084880.1	Tomm6os	antisense	1.09638	1.65721	0.596011	0.0134527	0.321873	1.97688	0.0497619
ENSMUSG00000052848.7	RP24-572L22.1	lincRNA	1.09529	1.6328	0.576044	0.0143606	0.439258	1.30653	0.0136221
ENSMUSG00000110020.1	RP24-502E20.5	antisense	3.00809	4.3976	0.547871	0.0146242	0.436673	2.00952	0.00597553
ENSMUSG00000038152.4	RP23-166O7.1	lincRNA	2.89373	1.65979	-0.801932	0.0150367	-0.806752	0.395762	0.000396
ENSMUSG00000097032.2	RP24-372J15.1	antisense	1.47042	2.43853	0.729786	0.0152734	0.411802	0.980283	0.0655875
ENSMUSG00000115122.1	RP23-101E7.1	antisense	0.978021	1.54169	0.656573	0.0158747	0.460277	2.87988	0.001575
ENSMUSG00000044125.6	RP23-80B16.3	processed_transcript	1.1042	1.78483	0.692788	0.0169706	0.638242	0.915874	0.00294316
ENSMUSG00000087674.7	RP23-34E4.1	lincRNA	1.32233	2.08709	0.65841	0.0182199	0.474972	1.72411	0.0101468
ENSMUSG00000097601.2	RP24-573N21.3	lincRNA	0.75903	1.29882	0.774972	0.020137	0.480495	2.69928	0.000431357
ENSMUSG00000086350.1	AC166710.3	antisense	1.88687	1.22535	-0.622797	0.0206418	-0.575695	1.84853	0.000596548
ENSMUSG00000108872.1	RP23-124O24.4	processed_transcript	3.81004	5.51569	0.533735	0.0207275	0.373357	2.25722	0.0248624
ENSMUSG00000073073.4	RP23-384G1.1	processed_transcript	0.980631	1.54533	0.65613	0.0208519	0.401874	1.14883	0.0434326
ENSMUSG00000097311.7	RP23-14P23.2	processed_transcript	9.32459	14.3231	0.619232	0.0245689	0.719425	3.18212	2.79399e-05
ENSMUSG00000098178.1	RP23-81C12.3	lincRNA	144.76	94.063	-0.621966	0.0280255	-0.730044	8.07013	0.00111888
ENSMUSG00000087022.4	RP24-123J3.1	processed_transcript	7.01155	10.1558	0.534502	0.0288653	0.46955	3.57274	0.0253779
ENSMUSG00000104586.1	RP23-375H15.2	lincRNA	2.18501	1.18075	-0.887932	0.02918	-0.885536	1.88545	0.00027251
ENSMUSG00000105218.4	RP23-438O22.1	lincRNA	1.00703	2.05916	1.03195	0.0295653	0.779166	1.95024	3.59896e-05
ENSMUSG00000097998.1	RP23-459L15.5	lincRNA	3.34647	5.54294	0.728011	0.0325257	0.688086	0.341571	0.00277935
ENSMUSG00000097796.1	Gm16702	lincRNA	1.0804	1.86602	0.788407	0.0325974	0.392791	2.82014	0.00216111
ENSMUSG00000044081.7	Zfp85os	processed_transcript	0.943153	1.38471	0.554015	0.0363676	0.465073	1.45575	0.00886978
ENSMUSG00000115420.1	Rmrp	lincRNA	2405.13	3803.44	0.66119	0.0416407	0.53425	8.44214	0.00630363
ENSMUSG00000093629.1	Prox2os	antisense	1.98299	2.84449	0.520488	0.0444056	0.37554	1.18204	0.0510679
ENSMUSG00000115867.1	RP23-414K1.6	lincRNA	1.80046	2.68531	0.57672	0.0526009	0.432661	1.80769	0.0216566
ENSMUSG00000085829.1	RP24-285J23.2	antisense	0.945693	1.42816	0.594713	0.0530838	0.461658	1.23593	0.00479386
ENSMUSG00000097083.1	RP24-505E24.3	antisense	0.844482	1.41588	0.745557	0.0536504	0.660189	2.15787	0.00442999
ENSMUSG00000087435.1	RP23-399D3.4	antisense	2.59341	4.17565	0.687154	0.0550844	0.565127	1.17936	0.0175023
ENSMUSG00000092368.1	RP24-443D19.8	antisense	0.872308	1.44964	0.732781	0.0573121	0.0639964	1.47134	0.701063
ENSMUSG00000098243.3	RP23-393I12.2	processed_transcript	2.02042	2.99812	0.569399	0.0604355	0.368118	0.328652	0.0967949
ENSMUSG00000105345.1	RP23-301L9.3	lincRNA	1.99595	2.82897	0.503201	0.0608575	0.349973	2.20632	0.0426307
ENSMUSG00000097182.2	RP23-241P22.1	lincRNA	1.0444	1.5617	0.580454	0.06671	0.466283	1.66714	0.0432254
ENSMUSG00000113330.1	RP24-485P18.2	lincRNA	0.851419	1.40414	0.721748	0.0669569	0.539696	1.26718	0.00782875
ENSMUSG00000063623.3	RP23-233O21.5	processed_transcript	2.42235	3.45524	0.512379	0.0697523	0.154825	1.9733	0.339757
ENSMUSG00000086006.2	RP23-291L24.2	lincRNA	1.40535	0.774026	-0.860471	0.0729174	-0.78785	0.738652	0.00870342
ENSMUSG00000097248.9	RP23-433F5.1	lincRNA	5.8098	1.57907	-1.87942	0.0793538	-1.61776	2.35588	0.000140639
ENSMUSG00000107451.1	RP23-370A2.7	lincRNA	1.23729	1.96897	0.670259	0.087699	0.448387	0.762648	0.0778706
ENSMUSG00000097835.1	Gm26910	lincRNA	1.65879	2.76713	0.73826	0.0944616	0.18085	0.640415	0.38079
ENSMUSG00000086290.8	Snhg12	lincRNA	22.4691	28.7077	0.353493	0.000206314	0.26648	3.34516	0.00934255
ENSMUSG00000097156.7	RP23-168E14.7	lincRNA	28.771	39.7355	0.465811	0.000376854	0.402654	5.48449	7.12435e-07
ENSMUSG00000097750.2	RP23-358K1.3	antisense	1.52103	2.07012	0.44467	0.000502318	0.414758	2.66654	0.000352869
ENSMUSG00000074024.5	AC104921.1	bidirectional_promoter_lncRNA	5.19252	6.0607	0.22305	0.000576755	0.120396	4.88035	0.116487
ENSMUSG00000094002.3	RP23-195H19.1	lincRNA	13.0853	16.9062	0.369605	0.0007964	0.363647	5.33813	3.39061e-05
ENSMUSG00000029386.15	Tctn2	processed_transcript	6.29997	7.77074	0.302708	0.00103472	0.225227	3.92488	0.0165997
ENSMUSG00000101609.2	Kcnq1ot1	antisense	3.15441	4.04718	0.359549	0.0012575	0.28942	8.41887	9.6326e-05
ENSMUSG00000063235.16	Ptpmt1	processed_transcript	5.72689	5.06743	-0.176499	0.0013719	-0.217201	4.08791	0.0123553
ENSMUSG00000029447.11	Cct6a	processed_transcript	65.1334	53.6449	-0.279956	0.00140317	-0.383238	6.88552	1.75353e-07
ENSMUSG00000086841.1	RP23-234K24.8	processed_transcript	32.6513	41.1899	0.335151	0.00160586	0.143792	3.27739	0.163825
ENSMUSG00000108434.1	RP23-291B1.2	lincRNA	1.19579	1.56066	0.384198	0.00169416	0.247038	1.70602	0.0869134
ENSMUSG00000097451.10	Rian	processed_transcript	573.439	696.477	0.280436	0.0017494	0.165407	9.40518	0.018341
ENSMUSG00000095123.1	RP24-538B17.1	lincRNA	2.92752	3.66127	0.322666	0.00179441	0.207114	3.78074	0.0253331
ENSMUSG00000071753.11	RP23-146D13.2	processed_transcript	5.54832	7.49094	0.433096	0.00201022	0.325528	3.70363	0.000918898
ENSMUSG00000098332.2	RP24-176F12.14	processed_transcript	10.6262	7.86917	-0.433337	0.00215527	-0.451174	1.27877	0.00701772
ENSMUSG00000085438.1	RP23-22A15.2	lincRNA	90.1616	99.4674	0.14171	0.00243939	0.0396274	9.20832	0.536513
ENSMUSG00000108621.1	RP23-402K24.2	lincRNA	2.01348	1.60906	-0.323477	0.00278983	-0.374478	4.59934	1.76229e-05
ENSMUSG00000022639.14	Dubr	lincRNA	3.45787	2.79334	-0.307891	0.00279213	-0.121232	3.32658	0.246874
ENSMUSG00000085208.3	Brip1os	antisense	3.0556	2.42751	-0.331978	0.00286874	-0.294887	3.42817	0.00455477
ENSMUSG00000097545.7	Mir124a-1hg	lincRNA	30.9717	37.7495	0.285508	0.00392461	0.164603	6.74543	0.0349898
ENSMUSG00000097994.1	RP23-392K24.4	antisense	3.87525	5.40553	0.480148	0.00538287	0.42177	2.02991	0.0036099
ENSMUSG00000096929.7	RP23-445K23.4	processed_transcript	18.7243	22.7443	0.280588	0.00603073	0.185365	6.05076	0.0143615
ENSMUSG00000085396.7	Firre	processed_transcript	6.86684	7.82337	0.188143	0.00609197	0.0748331	5.45603	0.353868
ENSMUSG00000052479.5	AC140724.2	lincRNA	1.83411	2.41177	0.395009	0.00641634	0.326271	2.51375	0.00931436
ENSMUSG00000098912.7	RP23-199B2.4	processed_transcript	27.4637	31.3891	0.192735	0.00647535	0.157271	6.64996	0.0233558
ENSMUSG00000086606.1	RP23-230I5.2	antisense	7.24628	9.53273	0.395648	0.00649913	0.252555	1.58132	0.104557
ENSMUSG00000097604.1	RP24-220A15.1	lincRNA	3.35426	4.26454	0.346395	0.00686402	0.261212	2.57613	0.0383141
ENSMUSG00000087479.1	RP24-414E6.2	processed_transcript	0.936967	1.29791	0.47012	0.00696719	0.288821	1.94735	0.0431354
ENSMUSG00000085433.2	AC113474.3	lincRNA	3.43826	4.46017	0.375423	0.00710769	0.213808	1.91902	0.134907
ENSMUSG00000111291.1	RP23-162P10.8	lincRNA	1.76052	2.20182	0.3227	0.00860478	0.278814	2.80622	0.0223423
ENSMUSG00000097428.1	RP23-168E14.4	processed_transcript	4.09887	5.26287	0.36062	0.0092181	0.146524	3.37849	0.20843
ENSMUSG00000110523.1	RP24-94F12.2	lincRNA	3.67204	5.09235	0.471752	0.00961639	0.284709	3.91903	0.0136566
ENSMUSG00000097736.8	RP23-361B11.2	lincRNA	12.3382	10.0199	-0.300264	0.00975344	-0.392956	4.38116	6.96048e-05
ENSMUSG00000113902.1	RP24-262G23.6	bidirectional_promoter_lncRNA	45.8911	37.4913	-0.291661	0.010447	-0.388799	4.64523	1.5339e-05
ENSMUSG00000072893.12	RP23-210M6.5	processed_transcript	1.53946	1.9989	0.376781	0.0131036	0.299294	3.20185	0.0136983
ENSMUSG00000091509.7	RP23-315I4.2	processed_transcript	6.08593	6.89554	0.180187	0.0131543	0.112413	3.08817	0.305283
ENSMUSG00000097885.7	RP24-511H12.3	processed_transcript	1.3811	1.60897	0.220317	0.013625	0.0441205	2.38551	0.739663
ENSMUSG00000098051.1	RP23-359C15.10	lincRNA	10.9539	14.2849	0.383041	0.0138361	0.298294	3.27139	0.0157596
ENSMUSG00000097277.7	WI1-1616M8.2	lincRNA	4.39671	5.09469	0.212571	0.0142387	0.142017	1.99448	0.316283
ENSMUSG00000087380.7	RP23-402K12.2	processed_transcript	15.8079	20.4427	0.37094	0.0155759	0.208664	3.0521	0.120054
ENSMUSG00000087475.3	RP24-403B15.1	lincRNA	3.87805	5.3133	0.454274	0.0156438	0.357413	2.45914	0.00496681
ENSMUSG00000109321.1	RP23-54G8.1	processed_transcript	10.2344	12.804	0.323167	0.0161602	0.290574	4.28455	0.00831996
ENSMUSG00000097801.1	RP23-454I20.3	bidirectional_promoter_lncRNA	1.37525	1.69802	0.30416	0.017763	0.174508	1.76534	0.248013
ENSMUSG00000084910.1	RP24-535M24.3	processed_transcript	1.62365	1.26458	-0.360588	0.0183677	-0.236646	2.0253	0.0797558
ENSMUSG00000103436.1	RP23-135F22.6	processed_transcript	1.8369	2.55432	0.475667	0.0207302	0.412602	3.32289	0.00335795
ENSMUSG00000074578.13	Zfas1	processed_transcript	22.1675	17.7874	-0.317594	0.0208419	-0.337327	3.28671	0.00263917
ENSMUSG00000097820.3	RP24-93F20.4	antisense	2.78473	3.73073	0.421919	0.0220334	0.277969	3.02603	0.0322339
ENSMUSG00000097039.8	Pvt1	lincRNA	7.21583	8.34857	0.210364	0.0234661	0.217467	4.2256	0.0137651
ENSMUSG00000097119.1	B230354K17Rik	lincRNA	5.43551	4.41045	-0.30149	0.0235392	-0.275628	4.49705	0.00339371
ENSMUSG00000108037.2	RP24-503A2.6	processed_transcript	1.62179	1.93338	0.253537	0.025217	0.214967	2.35349	0.115266
ENSMUSG00000056579.18	Tug1	antisense	27.6271	25.1561	-0.135179	0.02525	-0.231964	6.81345	0.00104835
ENSMUSG00000086370.8	Ftx	lincRNA	14.0211	17.2924	0.302536	0.0255611	0.232026	5.37372	0.00872425
ENSMUSG00000100691.1	RP23-410L16.1	lincRNA	5.9057	4.75994	-0.311166	0.0259209	-0.33214	1.92834	0.0265511
ENSMUSG00000108079.1	RP23-4F16.6	antisense	2.40805	3.3224	0.464362	0.026179	0.348479	1.00769	0.0868899
ENSMUSG00000109554.1	RP24-274B19.1	lincRNA	1.80785	2.45639	0.442263	0.0279138	0.40251	3.17478	0.00174145
ENSMUSG00000101599.1	RP23-13C17.6	lincRNA	1.42328	1.67835	0.237826	0.0279891	0.143195	3.90403	0.134541
ENSMUSG00000097324.8	Mir143hg	lincRNA	0.914287	1.23751	0.436715	0.028241	0.167457	0.515699	0.383892
ENSMUSG00000073236.4	RP23-192G18.7	processed_transcript	2.91809	2.25875	-0.369498	0.0296987	-0.348221	2.18095	0.0181598
ENSMUSG00000097908.7	RP24-456B4.4	lincRNA	1.98546	2.49178	0.327708	0.0304199	0.22906	2.96387	0.0677174
ENSMUSG00000085622.9	RP24-273K21.3	processed_transcript	5.51548	4.90027	-0.170624	0.0316744	-0.207946	2.14368	0.115882
ENSMUSG00000085030.1	AC147266.3	lincRNA	4.28861	5.90357	0.461079	0.0321685	0.221765	3.05596	0.0762773
ENSMUSG00000087038.9	RP23-152P11.2	lincRNA	2.57816	3.5188	0.448741	0.0323639	0.384805	2.47721	0.0327727
ENSMUSG00000101970.6	RP23-32A8.1	processed_transcript	11.1357	8.74322	-0.348949	0.0329361	-0.423958	4.0093	3.01573e-05
ENSMUSG00000087143.9	RP23-471B6.2	antisense	5.77426	7.62852	0.401767	0.0373593	0.402218	4.14212	0.00117346
ENSMUSG00000097061.2	RP23-17K9.18	bidirectional_promoter_lncRNA	7.00554	8.18153	0.223874	0.0389048	0.0893764	3.86826	0.393761
ENSMUSG00000087334.1	RP23-97B15.2	antisense	3.20185	4.46175	0.478702	0.039203	0.337526	1.40591	0.0689977
ENSMUSG00000053214.7	RP23-224J9.3	processed_transcript	4.25601	5.38996	0.340773	0.0413958	0.0508526	1.50479	0.765414
ENSMUSG00000097971.3	RP23-81C12.1	lincRNA	957.546	885.22	-0.113306	0.0416897	-0.217097	11.1713	0.00199903
ENSMUSG00000098202.1	RP23-378G4.2	lincRNA	1.23483	1.63337	0.403541	0.0418536	0.370891	2.84847	0.0122611
ENSMUSG00000097164.2	Cep83os	bidirectional_promoter_lncRNA	4.4907	5.48133	0.287586	0.0419283	0.197475	4.65789	0.0741236
ENSMUSG00000056771.7	RP24-363O21.4	lincRNA	4.45185	5.61447	0.334746	0.0449503	0.270832	3.26864	0.0420165
ENSMUSG00000050936.5	RP23-16G3.1	lincRNA	2.24403	3.13681	0.483212	0.0489265	0.294693	1.44657	0.135433
ENSMUSG00000073155.12	RP23-338E5.2	lincRNA	9.5114	7.87876	-0.27169	0.0538098	-0.346279	2.69795	0.00671298
ENSMUSG00000097350.1	4732491K20Rik	lincRNA	1.76943	2.24649	0.34439	0.0542728	0.239338	2.34469	0.091075
ENSMUSG00000085148.1	Mir22hg	processed_transcript	11.3658	13.4293	0.240693	0.0564666	0.132943	4.00989	0.227428
ENSMUSG00000043993.6	RP23-37J21.9	processed_transcript	1.92273	2.60455	0.437878	0.0571065	0.208949	1.68571	0.247189
ENSMUSG00000029878.6	RP23-182N12.4	lincRNA	16.9243	21.6976	0.358442	0.0571576	0.25933	6.25241	0.0317535
ENSMUSG00000085037.1	RP23-12I24.9	processed_transcript	2.09784	2.52109	0.265141	0.0572462	0.143911	3.29518	0.199762
ENSMUSG00000097316.2	CAAA01201205.3	antisense	1.7379	1.37126	-0.341846	0.0576032	-0.176207	2.12723	0.231302
ENSMUSG00000097375.2	RP24-270A10.4	lincRNA	10.1704	8.61482	-0.239486	0.0587965	-0.32348	3.9775	0.00355561
ENSMUSG00000085334.7	RP23-153M14.4	processed_transcript	6.39564	7.81899	0.289894	0.0588762	0.141472	4.12439	0.162279
ENSMUSG00000097769.7	Snhg4	processed_transcript	4.71481	5.50992	0.224832	0.0590545	0.10433	2.07273	0.468191
ENSMUSG00000086429.9	Gt(ROSA)26Sor	antisense	9.03481	7.35217	-0.297323	0.0647998	-0.282418	2.75036	0.0391098
ENSMUSG00000059277.12	AC015800.4	processed_transcript	1.63727	2.0035	0.291236	0.0658004	0.243888	2.34735	0.0492775
ENSMUSG00000097246.1	Gm26890	lincRNA	1.14712	1.39224	0.279394	0.0670983	0.202059	1.87071	0.187812
ENSMUSG00000072847.4	RP23-70A15.2	lincRNA	4.95813	5.60062	0.175793	0.0679252	0.084886	3.51618	0.419632
ENSMUSG00000107230.1	RP23-345O17.5	antisense	1.16233	1.39076	0.258857	0.06906	0.305715	0.65377	0.154489
ENSMUSG00000111080.1	RP23-128C4.4	lincRNA	13.7402	15.339	0.158799	0.069112	0.0944741	5.33574	0.246559
ENSMUSG00000085069.2	RP23-360O1.1	antisense	3.70643	4.50257	0.280719	0.070936	0.176682	3.41366	0.162572
ENSMUSG00000096995.2	RP23-3K10.3	bidirectional_promoter_lncRNA	4.30829	5.63229	0.386606	0.0744188	0.311803	2.93104	0.0669282
ENSMUSG00000087177.7	RP24-271F24.2	antisense	14.4315	16.4254	0.18671	0.0747533	0.158656	4.02015	0.107476
ENSMUSG00000097440.2	RP23-249P18.1	antisense	3.281	2.70334	-0.279395	0.0753921	-0.299577	2.43726	0.0204127
ENSMUSG00000060380.3	RP24-175C20.1	lincRNA	2.70203	3.35985	0.314351	0.0765742	0.0583991	1.59296	0.72057
ENSMUSG00000091985.1	RP23-406B13.10	lincRNA	1.45313	1.71796	0.241537	0.077743	0.0699941	2.51019	0.568428
ENSMUSG00000097785.1	B230217O12Rik	lincRNA	4.30362	3.31704	-0.375653	0.0807285	-0.442704	2.43122	0.00490225
ENSMUSG00000084890.1	RP23-336D20.8	antisense	13.1177	17.7954	0.439993	0.081771	0.339887	5.30678	0.050147
ENSMUSG00000097583.2	RP23-200C3.5	processed_transcript	3.54609	4.62536	0.383338	0.0817788	0.317612	2.05444	0.0443416
ENSMUSG00000085566.1	RP23-228H14.6	processed_transcript	3.44843	4.24445	0.299641	0.0822263	0.243071	3.61442	0.028108
ENSMUSG00000097577.2	RP23-300H21.3	antisense	1.19256	1.52137	0.351308	0.0823465	0.255623	1.59982	0.163538
ENSMUSG00000097743.1	RP23-121M22.10	lincRNA	2.44838	1.97865	-0.307309	0.0838311	-0.342931	1.86443	0.0336127
ENSMUSG00000103983.1	RP23-395H6.2	lincRNA	0.947599	1.12271	0.244635	0.0863281	0.164518	2.43008	0.214169
ENSMUSG00000086725.1	RP23-313I4.3	processed_transcript	2.33178	3.0734	0.398408	0.0880916	0.232212	2.36748	0.147339
ENSMUSG00000087269.1	RP23-32C16.1	processed_transcript	3.41252	4.21902	0.306072	0.0881794	0.131359	1.47702	0.446226
ENSMUSG00000097777.7	RP23-269E5.5	antisense	1.12163	1.46049	0.380855	0.0897473	0.320272	1.11658	0.0884799
ENSMUSG00000092274.2	Neat1	lincRNA	15.2471	19.4936	0.354465	0.0900643	0.247499	5.85628	0.074752
ENSMUSG00000115810.1	RP24-388K7.1	bidirectional_promoter_lncRNA	2.71158	3.44057	0.343515	0.0935233	0.268282	0.678693	0.193405
ENSMUSG00000113622.1	RP24-128N20.2	lincRNA	4.16658	5.51245	0.40383	0.0942081	0.270794	0.810195	0.199978
ENSMUSG00000109814.1	RP23-478L20.2	lincRNA	2.14389	1.93384	-0.148763	0.094322	-0.143714	1.73836	0.325514
ENSMUSG00000085586.1	RP23-94N18.4	processed_transcript	2.83861	3.38407	0.253575	0.0975933	0.251504	2.93958	0.0372249
ENSMUSG00000087497.7	RP23-78H18.2	antisense	4.40395	3.65841	-0.267583	0.0976548	-0.233306	2.3333	0.0857446
ENSMUSG00000110710.1	RP24-263E2.3	lincRNA	3.70433	4.18982	0.177672	0.102403	0.0706002	4.19387	0.479296
ENSMUSG00000106317.1	RP24-500I24.6	lincRNA	1.48902	1.18239	-0.332657	0.102993	-0.395669	0.673217	0.0337591
ENSMUSG00000105703.2	RP24-378G4.3	processed_transcript	1.99923	3.94522	0.980663	0.103737	0.187532	2.7411	0.339183
ENSMUSG00000097814.5	Panct2	antisense	1.34311	1.72398	0.360161	0.10713	0.283301	3.19917	0.0306011
ENSMUSG00000113429.1	RP24-345D17.1	lincRNA	2.84015	3.39301	0.256597	0.113984	0.151278	1.61964	0.409714
ENSMUSG00000095334.2	RP23-142A14.3	processed_transcript	17.469	14.3078	-0.287993	0.114073	-0.420723	3.36887	0.00260528
ENSMUSG00000097915.2	RP23-195I24.2	antisense	5.61176	6.77752	0.272306	0.114589	0.171161	2.65699	0.272193
ENSMUSG00000097217.2	RP24-236O3.3	bidirectional_promoter_lncRNA	1.17139	1.68673	0.526001	0.114638	0.325767	0.482077	0.185939
ENSMUSG00000097924.2	RP23-445E16.1	bidirectional_promoter_lncRNA	1.02947	1.19515	0.215294	0.114744	0.171026	1.75956	0.258971
ENSMUSG00000109715.1	RP23-384C18.12	antisense	2.07166	2.72245	0.394117	0.116498	0.251353	2.68039	0.127842
ENSMUSG00000106688.1	RP24-294K15.4	lincRNA	1.45947	2.12376	0.541177	0.117306	0.45604	1.52662	0.0447786
ENSMUSG00000097649.2	RP23-130K20.1	antisense	1.71664	2.03594	0.246104	0.117443	0.281038	1.76962	0.0846587
ENSMUSG00000104597.1	RP24-68G17.4	antisense	18.9073	22.3645	0.242271	0.117476	0.142216	7.14937	0.204697
ENSMUSG00000106396.1	RP24-140D11.1	antisense	4.71739	6.26829	0.410083	0.119514	0.306867	2.07874	0.0513003
ENSMUSG00000089889.2	AC123686.3	antisense	3.68071	2.81851	-0.385051	0.119765	-0.359134	1.14593	0.0814853
ENSMUSG00000075514.4	RP23-177L19.1	antisense	4.65939	5.92907	0.347663	0.121258	0.237305	2.09908	0.122277
ENSMUSG00000074466.12	AC171273.3	antisense	1.46171	1.06244	-0.460275	0.126184	-0.34056	0.587754	0.132794
ENSMUSG00000073415.4	RP23-349B4.5	antisense	4.38675	4.00261	-0.132213	0.128874	-0.174055	2.8997	0.152261
ENSMUSG00000060149.6	RP23-7F9.1	lincRNA	4.7782	4.22244	-0.17839	0.130351	-0.247933	2.8712	0.0455376
ENSMUSG00000085151.7	RP23-105M23.4	processed_transcript	3.52015	4.51822	0.360118	0.132112	0.288741	2.33441	0.0715969
ENSMUSG00000087026.7	AC163703.7	processed_transcript	1.24843	1.60649	0.363803	0.132527	0.28735	2.02438	0.0624265
ENSMUSG00000097616.7	RP23-44E17.1	lincRNA	1.52499	1.20443	-0.340447	0.133685	-0.262551	0.83884	0.216791
ENSMUSG00000112280.1	RP24-347C6.4	processed_transcript	4.65874	5.20039	0.158681	0.133743	0.0884104	2.42585	0.520323
ENSMUSG00000101013.1	RP24-300D7.1	antisense	1.17863	1.32195	0.165557	0.135758	0.109555	2.71602	0.399357
ENSMUSG00000085385.7	Snhg17	processed_transcript	4.94247	6.3275	0.356405	0.136404	0.133005	2.75702	0.437922
ENSMUSG00000113047.1	RP23-95L9.7	lincRNA	1.5232	1.91681	0.331596	0.137422	0.16875	1.80295	0.236523
ENSMUSG00000110070.1	RP23-218K15.10	lincRNA	1.16766	1.51839	0.378919	0.137581	0.315758	2.32024	0.0505639
ENSMUSG00000087590.2	Epb41l4aos	lincRNA	9.54486	11.4573	0.263466	0.137806	0.14636	1.39303	0.375761
ENSMUSG00000115157.1	RP23-457H19.2	processed_transcript	2.03762	2.8281	0.472951	0.139136	0.29653	1.84053	0.0647181
ENSMUSG00000043644.4	RP23-82I5.2	bidirectional_promoter_lncRNA	2.8011	3.55159	0.342471	0.145893	0.418215	0.666297	0.0603505
ENSMUSG00000100017.2	RP23-170I24.2	bidirectional_promoter_lncRNA	1.46253	1.75028	0.259113	0.146349	0.092561	1.51091	0.573604
ENSMUSG00000098061.1	RP23-204I16.2	lincRNA	11.2309	12.0147	0.0973269	0.146671	-0.014907	4.20385	0.874362
ENSMUSG00000105265.4	Sox2ot	processed_transcript	16.5896	15.1234	-0.133506	0.149435	-0.258217	4.69022	0.00159215
ENSMUSG00000075511.9	RP24-375H14.1	lincRNA	1.95724	2.31675	0.243277	0.150226	0.14819	2.572	0.264913
ENSMUSG00000089706.7	RP23-178F20.1	processed_transcript	4.10546	5.62156	0.453426	0.151347	0.289949	2.10002	0.154266
ENSMUSG00000086155.7	AC110496.3	antisense	1.06742	1.6226	0.604182	0.151826	0.111416	0.653527	0.658275
ENSMUSG00000115317.1	RP23-310D3.2	lincRNA	1.28725	1.54019	0.258817	0.152555	0.391347	1.63589	0.010441
ENSMUSG00000103428.1	RP23-275B16.1	lincRNA	1.29066	1.66783	0.369867	0.153313	0.462471	1.12015	0.0256686
ENSMUSG00000115729.1	RP24-112I4.1	processed_transcript	2.38692	3.00538	0.332399	0.153777	0.0941047	1.60403	0.705498
ENSMUSG00000048603.8	RP24-76E2.3	bidirectional_promoter_lncRNA	2.22877	2.59113	0.217337	0.155189	0.0881164	1.56136	0.573099
ENSMUSG00000085282.8	RP24-69E21.1	processed_transcript	1.53087	1.32652	-0.2067	0.157589	0.21456	2.8059	0.0896589
ENSMUSG00000110357.1	RP23-345D18.4	antisense	5.07577	4.33513	-0.227548	0.157732	-0.316177	2.47933	0.0252198
ENSMUSG00000053332.13	Gas5	processed_transcript	107.191	111.986	0.0631248	0.158097	-0.0615808	5.47566	0.398091
ENSMUSG00000087413.1	RP23-386C23.1	antisense	1.68661	2.13596	0.340757	0.158192	0.225977	0.907542	0.280282
ENSMUSG00000111977.1	RP24-373J20.5	bidirectional_promoter_lncRNA	15.5028	17.7173	0.192634	0.158381	0.0885402	4.22936	0.452486
ENSMUSG00000108616.1	RP23-207N5.2	lincRNA	5.20248	6.35491	0.288672	0.159252	0.186824	4.5317	0.201181
ENSMUSG00000085882.1	RP23-192P17.5	processed_transcript	3.6188	4.31725	0.254601	0.164525	-0.0211852	2.16675	0.892468
ENSMUSG00000097145.5	RP24-309H3.4	processed_transcript	1.06183	1.58502	0.577947	0.166099	-0.0620099	0.151132	0.813214
ENSMUSG00000048106.5	RP23-105K2.3	lincRNA	5.6917	6.08702	0.096874	0.166484	0.0801881	4.45994	0.338711
ENSMUSG00000086171.7	Pcsk2os1	antisense	1.81614	2.40632	0.405954	0.167097	0.516294	2.97516	0.000247112
ENSMUSG00000087620.7	RP23-316B4.2	lincRNA	13.0175	15.0302	0.207412	0.167696	0.159901	5.3094	0.192482
ENSMUSG00000091510.4	AC151602.4	antisense	2.07971	1.63124	-0.350417	0.168366	-0.466749	0.0982183	0.0754079
ENSMUSG00000087088.2	RP24-252B21.2	antisense	1.47296	1.2591	-0.226325	0.169409	-0.471412	3.11453	0.000531293
ENSMUSG00000097589.9	Dleu2	processed_transcript	7.74498	8.89076	0.199046	0.172601	0.061967	3.9822	0.490138
ENSMUSG00000079179.9	Rab10os	antisense	22.286	24.3109	0.125462	0.173953	-0.00419264	5.21746	0.965856
ENSMUSG00000085767.1	RP23-306D20.7	antisense	1.49782	1.96595	0.392364	0.175582	-0.0116199	3.14706	0.925662
ENSMUSG00000096936.1	RP23-123P10.1	lincRNA	1.51203	1.85216	0.292724	0.17636	0.0388048	1.21767	0.862529
ENSMUSG00000097296.1	RP24-64D24.4	lincRNA	2.18802	3.2207	0.557749	0.177982	0.516662	0.414557	0.0500514
ENSMUSG00000109887.1	RP24-571A14.6	processed_transcript	1.66113	1.82835	0.138373	0.18527	0.279723	3.45774	0.00736615
ENSMUSG00000056145.5	RP23-469H5.1	lincRNA	6.50997	7.17034	0.13939	0.186254	0.0523187	4.9081	0.602991
ENSMUSG00000071181.2	RP24-211E15.2	processed_transcript	1.41437	1.7304	0.290953	0.186936	0.0899078	1.05584	0.65425
ENSMUSG00000079499.9	RP23-104G16.1	processed_transcript	3.8707	4.43865	0.197525	0.189652	0.145252	3.86132	0.25352
ENSMUSG00000086013.1	RP24-359O2.3	lincRNA	4.20224	5.09328	0.277437	0.191104	0.212877	1.50431	0.206197
ENSMUSG00000101037.1	RP23-260J19.3	antisense	2.2166	2.01949	-0.134362	0.192365	-0.139692	1.64168	0.362298
ENSMUSG00000097636.7	Mirt1	lincRNA	1.44248	2.11158	0.549773	0.193467	0.458682	2.18905	0.0784816
ENSMUSG00000097023.8	RP23-207N5.1	lincRNA	6.23736	7.24231	0.215515	0.194207	0.272718	3.91371	0.0255288
ENSMUSG00000087231.7	RP23-129P10.1	processed_transcript	1.06298	1.40226	0.399638	0.195481	0.182156	1.74049	0.333651
ENSMUSG00000097974.1	RP23-152P5.2	lincRNA	1.24641	0.893203	-0.480716	0.196127	-0.525098	0.973434	0.045578
ENSMUSG00000107879.1	RP24-363O21.3	lincRNA	6.06986	6.75494	0.154279	0.204446	0.0488415	4.22407	0.662114
ENSMUSG00000084792.1	RP24-83P13.2	lincRNA	1.63612	1.92762	0.236546	0.217957	0.249132	0.855398	0.250276
ENSMUSG00000112302.1	RP24-454N4.2	bidirectional_promoter_lncRNA	1.14372	1.2483	0.126237	0.218677	0.0515399	1.94452	0.715435
ENSMUSG00000052248.15	Zeb2os	antisense	2.12328	2.25087	0.0841865	0.218772	0.0890933	1.29571	0.571277
ENSMUSG00000090386.9	Mir99ahg	processed_transcript	7.04123	7.81175	0.149818	0.227388	0.257625	3.86265	0.0253124
ENSMUSG00000045464.5	RP23-16O15.2	processed_transcript	1.64249	1.43878	-0.191041	0.233763	-0.138513	1.51834	0.446566
ENSMUSG00000084865.1	RP23-116I16.1	antisense	2.25981	2.89233	0.356032	0.237459	-0.00100783	2.31179	0.993574
ENSMUSG00000071456.6	RP23-83G6.1	antisense	3.11928	3.40348	0.125796	0.242789	-0.189689	1.64671	0.29049
ENSMUSG00000050334.12	RP23-88A13.2	lincRNA	25.0891	27.2271	0.117984	0.243316	0.0188091	6.03005	0.824744
ENSMUSG00000085084.7	AC125047.1	lincRNA	3.05059	3.74898	0.297409	0.244955	0.181852	3.03379	0.262805
ENSMUSG00000037735.7	RP24-280B23.1	lincRNA	2.38709	2.08206	-0.197241	0.245312	-0.228085	2.23264	0.136446
ENSMUSG00000086118.1	RP23-188D9.1	processed_transcript	3.0458	3.29231	0.112279	0.248558	0.0575651	2.69864	0.645457
ENSMUSG00000099784.1	Dalir	lincRNA	1.05021	1.45883	0.474137	0.256805	0.366824	1.84863	0.0222028
ENSMUSG00000085492.7	Trmt61b	processed_transcript	2.33216	2.16217	-0.109187	0.257396	-0.225544	2.35527	0.0895569
ENSMUSG00000110424.1	RP23-336M16.3	processed_transcript	0.866608	1.21845	0.491599	0.257838	0.191949	0.167227	0.390692
ENSMUSG00000018451.6	RP23-83I13.10	lincRNA	103.986	109.606	0.0759307	0.261423	-0.0176266	6.78343	0.82224
ENSMUSG00000106164.1	RP24-292F8.1	lincRNA	1.51248	1.89835	0.327834	0.261871	0.3439	0.889614	0.0967917
ENSMUSG00000097536.2	RP23-212I23.1	lincRNA	2.71766	2.47072	-0.137435	0.268794	-0.0747668	2.80819	0.591512
ENSMUSG00000115220.1	RP23-63F23.5	lincRNA	1.58863	1.90367	0.261004	0.273285	0.461807	0.651231	0.0416327
ENSMUSG00000113204.1	RP23-95L9.5	lincRNA	6.03167	5.56442	-0.116325	0.278146	0.000632898	4.09779	0.994265
ENSMUSG00000104168.1	RP23-410B24.2	antisense	1.16291	0.906118	-0.359968	0.280643	-0.0344064	0.373273	0.902573
ENSMUSG00000097842.2	RP23-201L15.5	lincRNA	2.45413	2.11184	-0.216708	0.290919	-0.107694	2.30562	0.527452
ENSMUSG00000113216.1	RP23-128M23.2	lincRNA	2.14605	2.45476	0.193897	0.293462	0.224694	3.66813	0.0609845
ENSMUSG00000039563.6	AC131803.2	lincRNA	0.98342	1.29028	0.391806	0.296115	0.218396	0.3594	0.463957
ENSMUSG00000086873.1	AC125065.1	processed_transcript	1.12114	1.33782	0.254925	0.297389	0.00657955	0.555379	0.975255
ENSMUSG00000099696.6	RP24-247B20.1	lincRNA	9.40039	10.6685	0.182566	0.298007	0.101171	4.51548	0.406143
ENSMUSG00000085156.7	RP23-69P8.2	processed_transcript	1.2237	1.65221	0.433143	0.298715	0.00858356	0.0475668	0.971791
ENSMUSG00000085067.2	RP23-305C1.1	lincRNA	4.22595	4.74813	0.168083	0.299605	0.0887574	3.20134	0.540441
ENSMUSG00000087574.1	RP23-393B19.1	lincRNA	2.70151	3.1931	0.241194	0.301323	0.176979	1.63595	0.444519
ENSMUSG00000098206.1	RP23-44N5.6	lincRNA	0.941652	1.16075	0.301797	0.303313	0.277546	2.18866	0.0824547
ENSMUSG00000085227.1	AC159257.6	antisense	3.56639	2.88722	-0.304782	0.314944	-0.333279	1.69841	0.127705
ENSMUSG00000078247.3	Airn	antisense	1.69724	0.930326	-0.867384	0.316405	-0.610902	0.821933	0.0299803
ENSMUSG00000097055.2	RP23-15F7.3	antisense	2.00251	1.79217	-0.160104	0.316996	-0.226624	2.01484	0.123214
ENSMUSG00000108867.1	RP24-236C17.3	lincRNA	1.69963	1.99827	0.233529	0.317528	0.572316	0.52211	0.00794265
ENSMUSG00000102336.1	RP24-554B1.11	lincRNA	1.09155	1.2396	0.183499	0.318696	0.0234658	2.67464	0.893553
ENSMUSG00000090063.6	Dlx6os1	antisense	5.30091	4.35128	-0.284802	0.322181	-0.325543	4.21867	0.0586217
ENSMUSG00000097140.1	RP24-267K12.1	lincRNA	1.21027	0.9335	-0.374601	0.322429	0.0899561	0.426126	0.718413
ENSMUSG00000097195.9	Snhg5	processed_transcript	6.29739	5.9799	-0.0746327	0.323315	-0.179097	2.1781	0.188602
ENSMUSG00000096974.2	RP23-124L1.10	antisense	2.40177	2.14886	-0.160526	0.325925	-0.267686	0.869753	0.184545
ENSMUSG00000055125.7	RP24-76M8.1	lincRNA	2.9304	3.35202	0.193934	0.32934	-0.00578574	2.11452	0.975496
ENSMUSG00000110618.1	RP23-263C23.7	lincRNA	1.6927	1.8429	0.122651	0.329442	0.0741656	2.02634	0.600519
ENSMUSG00000092187.1	RP23-84M17.2	antisense	1.12893	1.36166	0.27041	0.334923	0.25198	0.110537	0.324857
ENSMUSG00000066057.6	RP24-133K9.1	lincRNA	8.33962	9.29393	0.156306	0.338233	0.0526497	3.65952	0.700205
ENSMUSG00000087174.7	RP23-250A14.2	processed_transcript	1.24219	1.41833	0.191308	0.338563	0.216077	3.10989	0.0738793
ENSMUSG00000093452.4	Zfhx2os	antisense	2.40217	1.47947	-0.699258	0.341765	-0.889569	2.89606	0.00499212
ENSMUSG00000104950.1	RP23-434H17.6	antisense	1.57134	1.68416	0.100029	0.342664	0.12549	2.4279	0.332758
ENSMUSG00000097062.1	Gm17586	lincRNA	3.25461	4.15521	0.35244	0.343057	0.292361	1.48126	0.254112
ENSMUSG00000104861.1	RP24-490H13.4	lincRNA	2.55505	3.12955	0.292604	0.343997	0.448896	1.19866	0.0363911
ENSMUSG00000097960.1	RP23-418G1.1	lincRNA	1.20398	1.42517	0.243321	0.346811	0.112525	1.42824	0.631056
ENSMUSG00000096056.1	RP23-440J15.7	processed_transcript	2.8194	3.29176	0.223472	0.347788	0.125761	3.78483	0.478191
ENSMUSG00000112278.1	RP23-454I20.1	antisense	1.31574	1.00597	-0.387289	0.349239	0.191261	0.299728	0.44205
ENSMUSG00000056753.3	RP24-64D24.6	antisense	1.13482	1.06704	-0.0888477	0.349625	-0.315869	0.836278	0.0925377
ENSMUSG00000085741.8	RP24-482A24.11	processed_transcript	3.44655	3.16678	-0.122135	0.35489	-0.175244	2.02564	0.239944
ENSMUSG00000097881.7	Celrr	lincRNA	1.22532	1.08215	-0.179252	0.356005	-0.180284	0.822303	0.324367
ENSMUSG00000110611.1	RP23-127B8.7	antisense	1.62677	2.10996	0.375206	0.357234	0.0863966	0.870119	0.745789
ENSMUSG00000098702.1	RP24-390G17.1	antisense	2.36143	2.76982	0.230131	0.3575	0.300453	1.76282	0.0826175
ENSMUSG00000092595.1	RP23-222K15.15	processed_transcript	1.6838	1.82768	0.118293	0.36026	-0.0706479	2.76742	0.613405
ENSMUSG00000085837.8	Kcnmb4os2	antisense	1.03257	1.18837	0.202745	0.368476	0.075812	0.191009	0.756241
ENSMUSG00000092090.2	RP23-189E15.2	lincRNA	1.6516	1.50374	-0.135305	0.376112	-0.192177	3.49254	0.135787
ENSMUSG00000115149.1	RP23-4P23.2	processed_transcript	1.12259	0.92937	-0.272513	0.379222	0.0687039	2.31125	0.6595
ENSMUSG00000105852.4	RP23-169H9.3	processed_transcript	1.56014	1.79426	0.201714	0.386488	0.162295	1.90792	0.368872
ENSMUSG00000115783.1	Bc1	lincRNA	1122.39	1634.4	0.542191	0.389314	0.470243	1.986	0.172073
ENSMUSG00000063087.14	AC121576.1	processed_transcript	2.03884	1.72647	-0.239924	0.394527	0.158409	3.33679	0.193349
ENSMUSG00000086368.2	RP23-41I11.9	lincRNA	1.17529	1.38116	0.232871	0.395608	0.0194914	0.656351	0.925183
ENSMUSG00000111929.1	RP23-359K10.9	antisense	1.61681	1.44969	-0.157399	0.400083	-0.314873	0.204643	0.201827
ENSMUSG00000085862.2	RP23-360N18.1	lincRNA	1.69872	1.58648	-0.0986233	0.408335	0.00800972	0.873732	0.966713
ENSMUSG00000100396.1	RP23-423G13.11	lincRNA	1.26318	1.47533	0.223977	0.408858	0.0854732	0.707765	0.693647
ENSMUSG00000086877.7	RP23-275N2.7	processed_transcript	2.11474	1.85964	-0.185451	0.415749	-0.14736	1.74911	0.315824
ENSMUSG00000098120.1	RP24-242N1.1	lincRNA	2.38528	2.1336	-0.160872	0.417095	0.247614	0.0455278	0.26151
ENSMUSG00000085207.1	RP24-225K18.6	antisense	1.67501	2.03546	0.281185	0.418519	0.141539	0.727626	0.584225
ENSMUSG00000098183.1	RP24-271M20.8	lincRNA	1.49164	1.72599	0.210516	0.423107	-0.190866	1.34253	0.250236
ENSMUSG00000097121.2	RP24-212D8.2	antisense	1.73948	1.95896	0.171428	0.425416	0.266365	1.3537	0.0886516
ENSMUSG00000110834.1	CAAA01180111.2	lincRNA	5.18544	4.41682	-0.231458	0.430688	-0.37379	1.08694	0.0728917
ENSMUSG00000099881.1	RP23-460F21.1	bidirectional_promoter_lncRNA	8.52591	8.21935	-0.05283	0.437181	-0.160449	3.72979	0.0933422
ENSMUSG00000097391.8	Mirg	lincRNA	25.8569	26.5886	0.0402585	0.438432	-0.0243026	6.18058	0.733906
ENSMUSG00000099964.6	RP23-285F13.1	antisense	1.31334	1.45478	0.147566	0.441228	0.109139	2.02584	0.495984
ENSMUSG00000097392.2	RP23-314A12.2	lincRNA	5.19179	5.38873	0.0537132	0.44184	-0.0299818	4.01736	0.752755
ENSMUSG00000115263.1	RP23-142O4.5	antisense	2.35725	2.09911	-0.167327	0.443098	-0.170036	1.28969	0.331994
ENSMUSG00000108228.2	RP23-132J21.5	lincRNA	1.06721	1.1689	0.131317	0.443489	0.157451	1.85642	0.352235
ENSMUSG00000084899.1	RP24-238B3.2	processed_transcript	3.02577	2.50177	-0.274352	0.450511	-0.471662	0.37014	0.0871281
ENSMUSG00000097165.1	2210008F06Rik	lincRNA	1.55405	1.76215	0.181308	0.456663	0.12399	0.67689	0.561535
ENSMUSG00000087259.7	RP23-468D17.1	lincRNA	7.06743	7.35593	0.057722	0.457853	-0.0646896	3.27112	0.593529
ENSMUSG00000087361.7	RP23-301M3.1	lincRNA	2.86771	3.20816	0.161847	0.459526	0.464642	2.20529	0.0017244
ENSMUSG00000087467.1	RP23-353O20.2	antisense	2.89008	3.87218	0.422039	0.460413	0.460263	0.0547331	0.143636
ENSMUSG00000091514.2	RP23-322E23.8	lincRNA	1.25989	1.19098	-0.0811543	0.460899	0.0131234	1.199	0.942135
ENSMUSG00000052629.5	RP23-38E14.1	antisense	1.55706	1.46168	-0.091202	0.46465	-0.179208	1.75824	0.261791
ENSMUSG00000090952.2	RP23-27D5.2	processed_transcript	1.68833	1.4558	-0.213782	0.466795	-0.0353808	0.797145	0.859176
ENSMUSG00000097059.1	Fam120aos	lincRNA	2.69712	2.98781	0.147667	0.468414	0.0455316	2.57528	0.748231
ENSMUSG00000098234.7	Snhg6	lincRNA	16.1091	14.9998	-0.102933	0.469036	-0.148321	2.47248	0.282935
ENSMUSG00000086502.1	AC136146.4	processed_transcript	5.04788	4.87937	-0.0489813	0.473045	-0.10409	2.94784	0.389085
ENSMUSG00000097093.2	RP23-432N1.9	bidirectional_promoter_lncRNA	1.48554	1.14811	-0.371721	0.481521	-0.242563	0.123431	0.454224
ENSMUSG00000097207.7	RP24-324L19.1	lincRNA	0.991545	1.11416	0.1682	0.482469	0.183611	3.16378	0.13934
ENSMUSG00000097944.1	RP23-441L19.1	bidirectional_promoter_lncRNA	1.31822	1.24432	-0.0832421	0.491432	-0.0505744	1.48833	0.741175
ENSMUSG00000087578.1	Ccdc142os	antisense	0.994256	1.09896	0.144447	0.4915	0.225683	0.0326468	0.344798
ENSMUSG00000097787.1	2700046G09Rik	lincRNA	2.48139	2.33634	-0.0868982	0.493639	-0.213017	1.75486	0.151181
ENSMUSG00000096975.1	Gm16386	lincRNA	1.55471	1.77413	0.190466	0.494505	0.195321	2.05717	0.276579
ENSMUSG00000091994.2	RP23-13B8.9	bidirectional_promoter_lncRNA	1.57826	1.47215	-0.10041	0.49769	-0.185493	2.03624	0.216382
ENSMUSG00000086968.8	AC079042.1	antisense	26.716	27.3102	0.0317319	0.49925	-0.0683518	6.13457	0.337462
ENSMUSG00000105891.4	RP23-63A19.1	lincRNA	1.66095	1.82236	0.133793	0.500352	0.0907571	1.23685	0.655569
ENSMUSG00000074876.5	Spata5l1	processed_transcript	1.58604	1.8206	0.198982	0.501801	0.0927641	1.16004	0.66099
ENSMUSG00000110080.1	RP23-4P23.1	processed_transcript	9.54039	9.01744	-0.0813304	0.51003	-0.0533554	3.8832	0.613253
ENSMUSG00000056735.5	AC121564.2	antisense	1.40679	1.18364	-0.249181	0.511677	-0.394119	1.11385	0.104928
ENSMUSG00000085457.3	RP23-262J21.8	antisense	3.28633	3.59749	0.130511	0.513578	0.159439	2.69413	0.197461
ENSMUSG00000073147.3	RP23-443N7.2	lincRNA	11.2184	11.6467	0.0540543	0.518114	0.0828162	4.41028	0.395032
ENSMUSG00000096954.1	Gdap10	lincRNA	1.64249	1.60239	-0.0356615	0.520185	-0.0757427	2.85094	0.496172
ENSMUSG00000043773.5	RP23-366E4.5	lincRNA	2.24254	1.92009	-0.22396	0.520495	-0.108525	2.05476	0.539644
ENSMUSG00000096221.3	RP23-242K15.24	antisense	1.58814	1.42732	-0.154034	0.521157	-0.12216	1.80943	0.464859
ENSMUSG00000052291.8	RP24-420A20.8	processed_transcript	1.35998	1.44529	0.0877761	0.527648	-0.0364244	1.32941	0.833081
ENSMUSG00000031838.8	Ifi30	processed_transcript	2.3166	2.02707	-0.192608	0.53147	-0.23904	0.677097	0.338343
ENSMUSG00000086693.1	RP24-386G2.2	antisense	1.10192	1.01259	-0.121967	0.532271	0.0849863	1.86852	0.610186
ENSMUSG00000106981.1	RP23-425N12.2	lincRNA	4.83577	4.5781	-0.0789951	0.533133	-0.220028	2.55567	0.103831
ENSMUSG00000086782.2	RP23-32L21.4	lincRNA	8.09648	7.48489	-0.113313	0.54039	-0.155647	2.09518	0.33222
ENSMUSG00000034587.8	RP23-17N7.4	processed_transcript	3.17771	3.10274	-0.0344424	0.542103	-0.0696169	2.57164	0.573024
ENSMUSG00000086119.2	RP23-162D3.2	antisense	10.4765	11.1501	0.0898985	0.547156	0.0075507	4.0098	0.952377
ENSMUSG00000075585.3	RP23-451A12.1	antisense	3.57904	3.83583	0.0999681	0.550766	-0.030987	4.06007	0.818244
ENSMUSG00000097414.2	RP23-278C10.3	antisense	1.61617	1.46856	-0.138179	0.551627	-0.0200804	2.37097	0.908035
ENSMUSG00000054426.11	RP24-155C13.1	processed_transcript	8.66511	9.38081	0.114494	0.555308	0.017323	1.37487	0.926468
ENSMUSG00000099632.1	RP23-117O11.4	antisense	3.39351	3.7536	0.145498	0.555445	-0.00138262	0.243058	0.995508
ENSMUSG00000092448.1	RP24-346E16.1	antisense	1.30952	1.42056	0.117419	0.557679	0.27209	1.3356	0.148439
ENSMUSG00000096943.1	Gm26721	lincRNA	1.14577	1.01274	-0.178056	0.557985	-0.189227	0.483373	0.397047
ENSMUSG00000109224.1	RP24-63G4.14	processed_transcript	7.37534	6.81318	-0.114382	0.560302	-0.210179	0.966273	0.280206
ENSMUSG00000086098.1	RP23-105M23.5	antisense	1.86248	2.00448	0.106001	0.561002	-0.0640029	0.515243	0.794836
ENSMUSG00000086191.1	Zfp652os	antisense	2.93667	3.24088	0.142203	0.565854	0.0143442	0.0131915	0.96117
ENSMUSG00000084799.7	Ino80dos	lincRNA	4.53313	4.27264	-0.0853798	0.570102	-0.071946	1.91218	0.626875
ENSMUSG00000074664.3	RP23-196E24.1	antisense	3.13185	3.34273	0.0940094	0.576886	0.179536	0.508068	0.442372
ENSMUSG00000053656.6	Dancr	lincRNA	4.22928	4.56875	0.111387	0.579359	-0.0206412	0.630962	0.917556
ENSMUSG00000109108.1	RP23-103E11.5	bidirectional_promoter_lncRNA	1.08907	0.949555	-0.197776	0.583156	0.0040971	0.0163599	0.987182
ENSMUSG00000102234.1	RP23-67I3.4	antisense	6.42238	6.07188	-0.0809647	0.585086	-0.133389	2.67107	0.260154
ENSMUSG00000107008.3	RP23-340E6.2	lincRNA	2.04542	1.83954	-0.153048	0.590389	-0.16781	1.23403	0.437686
ENSMUSG00000097131.1	D230017M19Rik	lincRNA	1.2189	1.14499	-0.0902376	0.591609	0.0577348	2.17437	0.683856
ENSMUSG00000100600.6	RP23-48C24.2	antisense	1.12847	1.25422	0.152428	0.592359	0.341976	3.69131	0.000668165
ENSMUSG00000085894.1	AC074336.1	processed_transcript	1.50629	1.39446	-0.111293	0.593876	-0.131489	1.24083	0.44636
ENSMUSG00000115650.1	RP23-248L5.2	lincRNA	1.01055	1.13072	0.162099	0.611131	0.0733429	0.0448973	0.795159
ENSMUSG00000097823.2	RP24-192L21.2	lincRNA	6.61343	6.84115	0.048838	0.612277	-0.066599	2.94493	0.591976
ENSMUSG00000063018.6	RP23-207H18.3	processed_transcript	6.21125	5.86259	-0.0833461	0.618473	-0.156015	2.15116	0.273043
ENSMUSG00000060424.14	Pantr1	lincRNA	35.813	33.6044	-0.0918301	0.624761	-0.0854579	4.22228	0.491577
ENSMUSG00000085408.1	RP23-233B9.7	processed_transcript	2.86691	2.99916	0.0650643	0.626899	-0.0539763	2.44726	0.690309
ENSMUSG00000092203.7	RP23-349B4.7	processed_transcript	8.23575	8.60394	0.0630974	0.630559	0.183721	2.01631	0.205398
ENSMUSG00000097343.2	RP23-17C12.6	processed_transcript	2.46189	2.35591	-0.0634788	0.635596	-0.0955701	2.26024	0.502077
ENSMUSG00000110279.1	RP24-235B15.4	antisense	1.26719	1.09182	-0.214902	0.639013	-0.325543	1.27449	0.0623357
ENSMUSG00000114469.1	RP23-457B18.1	antisense	3.05159	3.16875	0.0543527	0.639803	-0.0758923	2.78827	0.738726
ENSMUSG00000086212.7	Mkln1os	lincRNA	2.25118	2.07061	-0.120629	0.641322	0.262672	1.50457	0.112611
ENSMUSG00000085241.7	Snhg3	processed_transcript	4.71083	5.01192	0.0893799	0.643021	-0.030095	1.11338	0.877545
ENSMUSG00000102869.2	RP24-114E18.8	lincRNA	263.236	268.384	0.0279432	0.646935	-0.0704583	10.701	0.361546
ENSMUSG00000100164.1	RP24-467O4.1	bidirectional_promoter_lncRNA	5.571	5.71326	0.0363766	0.656844	-0.00311528	2.06697	0.981676
ENSMUSG00000113722.1	RP24-132G6.4	lincRNA	2.52801	2.68613	0.0875228	0.657414	0.147971	0.173679	0.552909
ENSMUSG00000113831.1	RP24-144G20.2	lincRNA	3.79595	3.94763	0.056524	0.660428	-0.053827	3.16495	0.67156
ENSMUSG00000086292.1	CH36-125B10.6	antisense	3.32686	3.55279	0.0947933	0.664131	0.235877	1.05968	0.298436
ENSMUSG00000086363.7	RP23-262C6.2	lincRNA	2.61232	2.86175	0.131563	0.666929	0.0147625	1.33363	0.931666
ENSMUSG00000102101.1	Zbtb11os1	antisense	1.83641	1.927	0.0694645	0.6715	-0.0511923	0.908387	0.796568
ENSMUSG00000104960.1	Snhg8	processed_transcript	39.4161	41.0043	0.0569884	0.671849	-0.032908	3.18243	0.791938
ENSMUSG00000024845.17	Tmem134	processed_transcript	3.41802	3.37101	-0.0199788	0.677811	-0.0786676	3.87147	0.418146
ENSMUSG00000100837.7	RP24-531B21.1	lincRNA	1.57843	1.43334	-0.139113	0.679138	0.275026	1.60004	0.113407
ENSMUSG00000103103.1	RP23-250G8.13	lincRNA	4.28238	4.05923	-0.0772084	0.683127	-0.150141	2.121	0.313637
ENSMUSG00000097162.2	RP24-344N22.1	bidirectional_promoter_lncRNA	1.39794	1.23783	-0.175492	0.683515	-0.369639	0.226659	0.109224
ENSMUSG00000108461.1	RP24-157O12.2	bidirectional_promoter_lncRNA	2.1917	2.35454	0.103397	0.686907	-0.0392882	0.200012	0.870424
ENSMUSG00000099681.1	RP23-456M3.4	antisense	2.3954	2.47626	0.0478933	0.688186	0.0536371	2.88629	0.687486
ENSMUSG00000116056.1	RP23-246A19.5	lincRNA	1.30306	1.41322	0.117083	0.693334	0.011031	0.822268	0.95745
ENSMUSG00000097466.8	RP24-290P19.2	antisense	1.53346	1.45749	-0.0733093	0.700995	-0.046839	1.14995	0.853969
ENSMUSG00000103041.1	RP24-372I24.4	antisense	2.09544	2.02453	-0.0496696	0.706268	-0.0942636	3.18257	0.393447
ENSMUSG00000087424.1	RP23-216M21.4	processed_transcript	1.12731	1.16954	0.0530474	0.714976	-0.0362088	2.46799	0.76681
ENSMUSG00000114771.1	RP23-53N20.5	lincRNA	1.52604	1.48419	-0.0401121	0.717715	0.039169	0.748505	0.84376
ENSMUSG00000110605.1	RP24-122D14.3	lincRNA	1.96604	1.90936	-0.0422016	0.722574	0.086599	3.31083	0.389027
ENSMUSG00000086889.1	Phf2os1	antisense	0.983422	1.05988	0.108017	0.724025	0.286488	0.271995	0.199021
ENSMUSG00000087694.8	RP23-230H3.7	processed_transcript	2.56062	2.44056	-0.0692838	0.733585	-0.0358571	1.28401	0.832884
ENSMUSG00000113121.1	RP23-96D5.3	antisense	2.81384	2.60328	-0.11221	0.734314	-0.250602	1.62957	0.189858
ENSMUSG00000113029.1	RP23-41J14.6	antisense	4.40866	4.54035	0.0424633	0.736006	-0.29846	1.93374	0.0826313
ENSMUSG00000091050.1	RP23-204C16.2	antisense	1.13869	1.06769	-0.0928806	0.736327	-0.315158	1.25777	0.142603
ENSMUSG00000006638.14	Abhd1	processed_transcript	1.57746	1.4679	-0.103845	0.737554	-0.191715	0.49885	0.536899
ENSMUSG00000116305.1	RP23-463E8.3	processed_transcript	5.39053	5.52658	0.0359585	0.743811	0.0249831	3.05595	0.848738
ENSMUSG00000106019.1	RP24-487F9.4	lincRNA	4.31321	4.41478	0.0335771	0.746122	-0.0737208	2.41079	0.637977
ENSMUSG00000097431.2	RP23-138C14.7	antisense	11.3262	11.6579	0.0416439	0.747075	0.0310005	4.50862	0.726535
ENSMUSG00000052125.16	RP24-112H7.1	bidirectional_promoter_lncRNA	4.79317	4.86372	0.0210808	0.751846	-0.0565982	3.86135	0.569038
ENSMUSG00000097048.7	RP23-20K24.5	antisense	5.8386	6.39345	0.130973	0.754734	0.124442	2.36697	0.439582
ENSMUSG00000063714.15	Sp3os	antisense	4.31417	4.73926	0.135579	0.757739	0.152168	1.10766	0.445454
ENSMUSG00000097290.8	RP23-245B21.3	lincRNA	2.94928	3.05726	0.0518741	0.76475	-0.0289077	2.52949	0.833821
ENSMUSG00000115311.1	RP23-114J12.10	antisense	1.61543	1.63705	0.0191722	0.764947	-0.119781	0.748216	0.707688
ENSMUSG00000087056.1	RP23-300D11.1	processed_transcript	1.32352	1.44	0.121689	0.76856	0.289501	0.187218	0.225376
ENSMUSG00000042579.2	RP24-122I22.2	lincRNA	5.737	5.80363	0.016659	0.772712	-0.0473064	4.22961	0.608722
ENSMUSG00000072761.10	RP23-15O6.1	lincRNA	2.94671	2.77968	-0.0841876	0.777374	0.166129	0.731307	0.380277
ENSMUSG00000084898.1	RP23-340N6.1	lincRNA	3.73881	3.97678	0.0890225	0.780061	-0.0413372	1.69281	0.818511
ENSMUSG00000085389.7	RP23-198O15.4	lincRNA	2.19014	2.13634	-0.0358821	0.795126	0.223569	0.684635	0.287853
ENSMUSG00000099843.1	RP24-79F8.3	lincRNA	1.03969	1.17077	0.171306	0.80224	0.314008	0.0684412	0.339868
ENSMUSG00000110945.1	RP23-453B15.7	antisense	1.75483	1.69992	-0.0458623	0.802326	0.13669	2.43434	0.28729
ENSMUSG00000097709.8	RP24-459P6.1	lincRNA	1.3682	1.38997	0.0227743	0.805616	0.240289	2.157	0.214056
ENSMUSG00000110980.1	RP24-175C20.18	lincRNA	4.93395	4.99361	0.0173408	0.806755	-0.0454701	2.85558	0.795439
ENSMUSG00000097585.2	RP24-88J19.1	processed_transcript	1.3693	1.39517	0.0269985	0.807045	0.117989	1.58512	0.510944
ENSMUSG00000097756.2	RP24-360F21.1	antisense	1.18143	1.19511	0.0166135	0.811822	-0.0177628	0.926532	0.93932
ENSMUSG00000085881.2	RP23-20A5.3	processed_transcript	2.35123	2.33082	-0.0125765	0.812357	0.310133	1.79662	0.0352715
ENSMUSG00000110156.1	RP23-453G12.2	antisense	6.75573	7.14286	0.0803912	0.814644	-0.118853	1.04514	0.581699
ENSMUSG00000097772.7	RP23-325M7.3	lincRNA	6.50813	6.27006	-0.0537644	0.819146	0.0967116	3.71414	0.389752
ENSMUSG00000097729.2	RP24-98A23.3	processed_transcript	2.6731	2.63084	-0.0229903	0.828317	-0.0566396	1.67354	0.708205
ENSMUSG00000097615.1	Gm2061	lincRNA	1.13079	1.1502	0.0245512	0.82911	-0.111357	1.17401	0.566882
ENSMUSG00000090031.2	AC139064.2	antisense	3.19625	3.20716	0.0049172	0.834519	-0.10035	2.73661	0.747786
ENSMUSG00000106874.1	RP23-148L8.3	lincRNA	2.09233	2.15387	0.0418173	0.839607	-0.0461463	1.75389	0.766567
ENSMUSG00000112941.1	CH25-660D15.2	lincRNA	28.8974	29.3515	0.0224982	0.839609	0.0983236	2.63179	0.471208
ENSMUSG00000092564.1	RP23-222K15.23	antisense	2.27955	2.29676	0.0108511	0.84279	0.0470765	0.947637	0.824534
ENSMUSG00000112117.1	Rmst	lincRNA	26.235	26.6745	0.0239725	0.853032	-0.117765	4.33765	0.488355
ENSMUSG00000108414.1	Snhg1	processed_transcript	9.33755	9.64937	0.0473911	0.854677	-0.0705198	2.29748	0.608402
ENSMUSG00000087165.7	RP23-268K22.2	processed_transcript	1.72855	1.75538	0.022213	0.856347	-0.15211	1.32812	0.354101
ENSMUSG00000087679.2	RP23-325E4.5	lincRNA	24.1162	23.9965	-0.0071801	0.874618	-0.101243	5.41378	0.204787
ENSMUSG00000101493.1	RP23-246F18.8	lincRNA	2.1932	2.22042	0.0177967	0.899678	0.0437255	0.820463	0.867036
ENSMUSG00000097251.2	RP23-45A13.2	antisense	2.31965	2.28234	-0.0233919	0.902957	-0.102118	1.97469	0.510347
ENSMUSG00000086851.1	RP23-188H3.3	processed_transcript	1.18289	1.17908	-0.00465491	0.908587	-0.118399	0.751343	0.583935
ENSMUSG00000097320.8	Tmem147os	antisense	8.35553	8.42407	0.0117857	0.916383	-0.0496511	3.00969	0.70149
ENSMUSG00000097353.1	A430046D13Rik	lincRNA	5.59466	5.61718	0.00579493	0.917423	-0.0185026	3.54945	0.85514
ENSMUSG00000090330.2	AC156992.2	antisense	5.00165	5.02133	0.00566543	0.920277	-0.110629	2.52379	0.382942
ENSMUSG00000098097.7	RP24-158L2.1	lincRNA	2.30426	2.45684	0.0925019	0.926902	-0.552323	2.28407	0.021713
ENSMUSG00000102215.1	RP23-333L19.2	lincRNA	2.13806	2.1111	-0.0183074	0.927019	-0.0895412	0.481875	0.666837
ENSMUSG00000111990.1	RP23-137I3.2	lincRNA	1.04485	1.03386	-0.0152432	0.927904	-0.113774	0.701371	0.56875
ENSMUSG00000113527.1	RP23-38P6.1	lincRNA	0.906022	1.35608	0.581822	0.932302	0.818275	0.167386	0.00120328
ENSMUSG00000113529.1	RP23-46D6.7	bidirectional_promoter_lncRNA	1.02474	1.00912	-0.0221683	0.932662	-0.115137	0.482037	0.610487
ENSMUSG00000097040.6	RP23-388A19.6	processed_transcript	3.87518	3.89673	0.00799971	0.940499	0.0720836	1.81783	0.661981
ENSMUSG00000089810.1	RP23-3F1.4	antisense	6.24753	6.29444	0.010791	0.943258	-0.0870357	2.95272	0.470833
ENSMUSG00000073478.6	AC115896.3	lincRNA	3.51263	3.66303	0.0604859	0.945123	-0.00953442	1.48152	0.967835
ENSMUSG00000085436.1	Zfp335os	antisense	1.62309	1.62617	0.00273286	0.947615	0.0879294	1.02346	0.66109
ENSMUSG00000085704.1	RP23-23G3.3	processed_transcript	1.46058	1.46383	0.00320664	0.957229	-0.0755861	1.07669	0.657346
ENSMUSG00000105361.1	Yam1	lincRNA	72.076	79.8812	0.148337	0.970059	2.17108	4.55076	0.365771
ENSMUSG00000108883.1	RP23-78N8.4	antisense	1.27058	1.08714	-0.224943	0.972305	-0.0822982	0.456602	0.705216
ENSMUSG00000098098.7	Bvht	lincRNA	1.20512	1.21433	0.0109843	0.976339	0.139195	0.240697	0.629056
ENSMUSG00000093565.1	Rab26os	antisense	20.4769	19.9103	-0.0404806	0.980398	-0.189435	1.18449	0.419351
ENSMUSG00000112627.1	RP23-413G8.2	bidirectional_promoter_lncRNA	1.5295	1.49238	-0.0354404	0.981112	-0.00622399	1.1416	0.977205
ENSMUSG00000109783.1	RP23-389N20.2	processed_transcript	1.11766	1.10461	-0.016945	0.981608	-0.00436254	0.149624	0.984786
ENSMUSG00000084790.1	RP23-171I6.4	antisense	2.76421	2.73766	-0.0139226	0.986068	0.107557	1.41401	0.547876
ENSMUSG00000087301.7	RP23-276I21.1	antisense	4.83701	4.83243	-0.00136519	0.986336	0.0882414	2.05403	0.621473
ENSMUSG00000111348.1	RP24-189I2.4	antisense	2.22703	2.19347	-0.021906	0.988665	-0.0688715	1.53705	0.678666
ENSMUSG00000086555.2	RP23-64F21.3	processed_transcript	2.36841	2.35916	-0.00565016	0.992233	-0.0693283	1.9995	0.644142
ENSMUSG00000107096.3	RP23-34P11.2	lincRNA	8.91849	8.89258	-0.00419782	0.996491	-0.258265	4.72715	0.0218067
